# Supplementary material for: Pattern and determinants of contraceptive usage among women of reproductive age from the Digo community residing in Kwale, Kenya: results from a cross-sectional household survey
Source: PubMed Central journal article supplement (PMC5759252; doi:10.1186/s12905-017-0497-5), 2018-01-08
Supplement: 12905_2017_497_MOESM1_ESM.pdf [file 12905_2017_497_MOESM1_ESM.pdf]

SEXUAL AND REPRODUCTIVE HEALTH SURVEY  
QUESTIONNAIRE

Interviewer: **Thank you for taking time to answer the following questions. I ask that you provide accurate answers to the best of your ability. You are free not to answer any question that may be uncomfortable to you.**

Name of village: \_\_\_\_\_ Interviewer: \_\_\_\_\_

1. In what month and year were you born?

Month  Don't know month

Year  Don't know year

2. How old were you at your last birthday?   Completed years  Don't know

3. Have you ever attended school?  Yes  No, skip to question 5

4. How many years did you attend school?   Completed years

5. Have you ever given birth?  Yes  No, skip to question 12

6. Do you have any sons/daughters to whom you have given birth who are now living with you?

Yes  No, skip to question 9

7. How many sons live with you?   Sons living at home

8. How many daughters live with you?   Daughters living at home

9. Do you have any sons/daughters to whom you have given birth, are alive but don't live with you?

Yes  No, skip to question 12

10. How many sons are alive but do not live with you?   Sons living elsewhere

SEXUAL AND REPRODUCTIVE HEALTH SURVEY  
QUESTIONNAIRE

11. How many daughters are alive but do not live with you?   *Daughters living elsewhere*

12. Have you ever given birth to a boy or girl who was born alive but later died?

Yes  No, *skip to question 15*

13. How many boys dead?   *Number of boys dead*

14. How many girls dead?   *Number of girls dead*

15. Are you pregnant now?  Yes  No, *skip to question 17*  Not sure, *skip to question 17*

16. How many months pregnant are you?   *Number of completed pregnancy months*

17. Have you ever had a pregnancy that miscarried, was aborted or ended in a stillbirth?

Yes  No, *skip to question 20*

18. When did the last such pregnancy end?

Month  Don't know month

Year  Don't know year

19. How many months pregnant were you when the last such pregnancy ended?

*Completed months*  Don't know

20. When did your last menstrual period start?

Day   Month     Year

**OR**

Days ago   Weeks ago   Months ago   Years ago

SEXUAL AND REPRODUCTIVE HEALTH SURVEY  
QUESTIONNAIRE

OR

Menopausal/has had hysterectomy  Before last birth  Never menstruated

21. From one menstrual period to the next, are there certain days when a woman is more likely to become pregnant?

Yes  No, skip to question 23  Don't know, skip to question 23

22. Is this time just before her period begins, during her period, right after her period has ended or halfway between two periods? (Tick all that apply)

Just before  During  Right after  Halfway  Other, specify \_\_\_\_\_

23. Now I would like to ask you about the various ways that a couple can use to delay or avoid a pregnancy. Have you ever heard of the following family planning methods?

- Female sterilization (women can have an operation to avoid having any more children)

Yes  No

- Male sterilization (men can have an operation to avoid having any more children)

Yes  No

- IUCD (women can have a loop or coil placed inside them to avoid having any more children)

Yes  No

- Injectable (women can have an injection that stops them from becoming pregnant)

Yes  No

- Implants (women can have one or more small rods placed under the skin in their upper arm which can prevent them from becoming pregnant)

Yes  No

- Pills (women can take a pill everyday to avoid becoming pregnant)

Yes  No

- Male condom (men can put a rubber sheath over their penis before sexual intercourse)

Yes  No

SEXUAL AND REPRODUCTIVE HEALTH SURVEY  
QUESTIONNAIRE

- Female condom (women can place a sheath in their vagina before sexual intercourse)

Yes  No

- Lactational amenorrhea method (women who are breastfeeding exclusively can avoid getting pregnant)

Yes  No

- Rhythm method (women do not have sexual intercourse on the days of the month they think they can get pregnant)

Yes  No

- Withdrawal method (men can be careful and pull out before climax)

Yes  No

- Emergency contraception (within 3 days after having unprotected intercourse, women can take special pills to prevent pregnancy as an emergency measure)

Yes  No

- Have you heard of any other ways or methods that women or men can use to avoid pregnancy?

Yes, specify \_\_\_\_\_  No

24. Now I want to ask you questions about your current or last complete pregnancy. *For women who have never gotten pregnant, skip to question 62.* When you got pregnant, did you want to get pregnant at that time?

Yes, skip to question 27  No

25. If no, did you want to get a baby later on or did you not want any (more) children?

Later  No more, skip to Q27

26. If you wanted to have your baby later, how much longer did you want to wait?

Months   Years  I don't know

SEXUAL AND REPRODUCTIVE HEALTH SURVEY  
QUESTIONNAIRE

27. Did you see/have you seen anyone for antenatal care of this pregnancy?

Yes  No, skip to question 39

28. If you did/have, whom did you see?

Health worker  TBA  CHW  Other, specify \_\_\_\_\_

29. How many months pregnant were you when you first received antenatal care during this pregnancy?

Months  I don't know

30. How many times did you receive/have you received antenatal care during this pregnancy?

Number of times  I don't know

31. As part of your antenatal care during this pregnancy, were any of the following done at least once?

- Was your blood pressure measured?

Yes  No  I don't know

- Did you give a urine sample?

Yes  No  I don't know

- Did you give a blood sample?

Yes  No  I don't know

32. During this pregnancy, were you told about the things to look out for that might suggest problems with the pregnancy?

Yes  No  I don't know

33. During this pregnancy, were you given an injection in the arm to prevent the baby from getting tetanus, that is, convulsions after birth?

Yes  No, skip to Q35  I don't know, skip to Q35

34. If you received the tetanus injection, how many times during the pregnancy did you get it?

Number of times  I don't know

SEXUAL AND REPRODUCTIVE HEALTH SURVEY  
QUESTIONNAIRE

35. During this pregnancy, were you given or did you buy any tablets or syrup to increase your blood levels?

Yes  No  I don't know

36. During this pregnancy, were you given or did you buy any drugs for intestinal worms?

Yes  No  I don't know

37. During this pregnancy, were you given or did you buy any drugs to keep you from getting malaria?

Yes  No, skip to Q39  I don't know, skip to Q39

38. How many times during this pregnancy did you take the drugs to prevent malaria?

Number of times  I don't know

39. Where did you give birth during your last pregnancy? *If no previous pregnancy, skip to Q62*

My home  Other home  Health facility  Other, specify \_\_\_\_\_

40. Who assisted with the delivery?

No one assisted  Health worker  TBA  CHW  Other, specify \_\_\_\_\_

41. How long after delivery did you stay there?

Hours   Days   Weeks  I don't know

42. Regarding your last delivery, was your child delivered by caesarean section, that is, did they cut your belly open to take out the baby?

Yes  No

43. Regarding your last delivery, was your child very large, larger than average, average, smaller than average or very small?

Very large  Larger than average  Average  Smaller than average  Very small

44. Was the child weighed?

Yes  No, skip to question 46  I don't know, skip to question 46

SEXUAL AND REPRODUCTIVE HEALTH SURVEY  
QUESTIONNAIRE

45. If the child was weighed, what was their weight?

kilograms     Milligrams  I don't know

46. I would now like to ask you about checks on your health after delivery, for example, someone asking you questions about your health or examining you. Did anyone check on your health after you gave birth?

Yes  No, *skip to question 50*

47. Who checked on your health at that time?

Health worker  TBA  CHW  Other, specify \_\_\_\_\_

48. How long after giving birth did the first check take place?

Minutes   Hours   Days   Weeks  I don't know

49. Where did this check occur?

My home  Other home  Health facility  Other, specify \_\_\_\_\_

50. I would like to ask you about checks on your baby's health after delivery, for example, someone asking you questions about their health or examining them. Did anyone check on the health of your baby after giving birth?

Yes  No, *skip to question 54*

51. Who checked on the health of your baby at the time?

Health worker  TBA  CHW  Other, specify \_\_\_\_\_

52. How long after delivery did the first check take place?

Minutes   Hours   Days   Weeks  I don't know

53. Where did this check occur?

My home  Other home  Health facility  Other, specify \_\_\_\_\_

54. Regarding your last delivery, did you ever breastfeed your baby?

Yes  No, *skip to question 58*

SEXUAL AND REPRODUCTIVE HEALTH SURVEY  
QUESTIONNAIRE

55. How long after delivery did you put your baby to the breast?

Minutes   Hours   Days   Weeks

56. In the first three days after delivery, was the child given anything else to drink apart from breast milk?

Yes  No, *skip to question 58*

57. If yes, what else was the child given to drink?

Water  Cow's milk  Other, specify \_\_\_\_\_

58. Has your baby ever been given childhood vaccinations?

Yes  No, *skip to question 62*

59. Do you have a card/booklet where your baby's vaccinations are written down? If yes, can I see it?

Yes (seen)  Yes (not seen), *skip to question 61*  No, *skip to question 61*

60. Verify dates for all vaccinations received?

All vaccinations received on schedule  Vaccinations not received on schedule

61. Has your child received any vaccinations that are not recorded on this card/booklet, including those given during a national immunization campaign?

Yes  No

62. I would now like to ask you questions regarding your marital status. Are you currently married or living together with a man as if married?

Yes, currently married  Yes, living with a man  Not in a union, *skip to question 68*

63. Is your husband/partner living with you now or is he staying elsewhere?

Living with me  Staying elsewhere

64. Does your husband have other wives or does he live with other women as if married?

Yes  No, *skip to question 67*  I don't know, *skip to question 67*



SEXUAL AND REPRODUCTIVE HEALTH SURVEY  
QUESTIONNAIRE

65. If yes, in total including yourself, how many wives or live-in partners does your husband have?

Total number  I don't know

66. Are you the first, second.....wife?   Rank

67. How old were you when you started living with your husband/partner?

Completed years  I don't know

68. If not currently married, have you ever been married or lived together with a man as if married?

Yes, formerly married  Yes, lived with a man  Never, skip to question 70

69. If yes, what is your current marital status?

Widowed  Divorced  Separated

70. Now I would like to ask you questions about sexual activity so as to get a better understanding of some important life issues. Let me assure you again that your answers are completely confidential and will not be told to anyone. If we should come to any question that you don't want to answer, just let me know and we will go to the next question. How old were you when you had sexual intercourse for the very first time?

Completed years  I don't know  Not yet, skip to question 78

71. I would like to ask you some questions about your recent sexual activity. When was the last time you had sexual intercourse?

Minutes ago   Hours ago   Days ago   Weeks ago

Months ago   Years ago

72. What was your relationship to this person with whom you last had sexual intercourse?

Husband/Partner  Boyfriend not live-in  Casual acquaintance  Other, specify \_\_\_\_\_

73. Did you use a condom the last time you had sexual intercourse?

Yes  No

SEXUAL AND REPRODUCTIVE HEALTH SURVEY  
QUESTIONNAIRE

74. How old was the person with whom you last had sexual intercourse?

Completed years  I don't know

75. Apart from this person, have you had sexual intercourse with any other person in the past 12 months?

Yes  No, skip to question 77

76. In total, how many different people have you had sexual intercourse with in the last 12 months?

Number of partners last 12 months  I don't know

77. In total, how many different people have you had sexual intercourse with in your lifetime?

Number of lifetime partners  I don't know

78. Have you ever been forced to have sexual intercourse against your will?

Yes  No

79. Do you know of a place where a person can get male condoms?

Yes  No, skip to question 81

80. If you wanted to, could you yourself get a male condom?

Yes  No  I don't know/Not sure

81. Do you know of a place where a person can get female condoms?

Yes  No, skip to question 83

82. If you wanted to, could you yourself get a female condom?

Yes  No  I don't know/Not sure

83. For women who are menopausal, sterilized or unable to bear children, skip to Q88. I have some questions about the future, would you like to have a child/another child or would you prefer not to have any more children?

Prefer a child/another child  No more, skip to Q85  I don't know/Not sure, skip to Q85

SEXUAL AND REPRODUCTIVE HEALTH SURVEY  
QUESTIONNAIRE

84. How long would you like to wait from now before giving birth to a child/another child?

Months   Years  Soon/Now  I don't know

85. Are you currently using a family planning method?

Yes, skip to question 88  No

86. You have said you do not want another child soon/do not want any more children, can you tell me why you are not using a method to prevent pregnancy? (*Tick all that apply*)

**Fertility-related reasons**

Not married  Not having sex  Infrequent sex  Menopausal/Hysterectomy

Can't get pregnant  Currently pregnant/breastfeeding  Not menstruated since last delivery

It's up to God/Fatalistic

**Opposition to use**

Respondent opposed  Husband/partner opposed  Others opposed

Religious prohibition

**Lack of knowledge**

Knows no contraceptive method  Knows no source of contraceptive method

**Method-related reasons**

Side effects/health concerns  Lack of access/Too far  Costs too much

Preferred method not available  No method available  Inconvenient to use

Interferes with body's normal processes  Other, specify \_\_\_\_\_

SEXUAL AND REPRODUCTIVE HEALTH SURVEY  
QUESTIONNAIRE

87. If not currently using a contraceptive method, do you think you will use a contraceptive method to delay or avoid pregnancy at any time in the future?

Yes, skip to Q89  No, skip to Q89

88. Which family planning method are you currently using? (Tick all that apply)

Female sterilization  Male sterilization  IUCD  Injectable  Implant

Pills  Male condom  Female condom  Lactational amenorrhea

Rhythm method  Withdrawal method  Emergency contraception

89. If you could choose exactly the number of children to have in your whole life or if you could go back to the time you did not have any children and could choose exactly the number of children to have in your whole life, how many would that be?

None   Number of children

90. If currently without husband/partner, skip to Q96. Would you say that using a family planning method is mainly your decision, mainly your husband's decision or you both decide together?

Respondent's  Husband/partner's  Joint decision  Other, specify \_\_\_\_\_

91. Does your husband/partner want the same number of children that you want, or does he want more or fewer than you want?

Same number  More  Fewer  Don't know

92. How old was your husband/partner on his last birthday?

Completed years  I don't know

93. Did your husband/partner ever attend school?

Yes  No, skip to question 95  I don't know, skip to question 95

94. How many years of school did he attend?

Completed years  I don't know

SEXUAL AND REPRODUCTIVE HEALTH SURVEY  
QUESTIONNAIRE

95. What kind of work does your husband/partner currently do?

Self-employed  Employed  I don't know

96. As you know, some women take up jobs for which they are paid in cash or in kind. Others sell things, have a small business or work on the family shamba or family business. In the last seven days, aside from your own housework, have you done any of these things?

Yes, skip to question 98  No

97. If no, have you done any work in the last 12 months?  Yes  No, skip to question 99

98. *If currently without husband/partner, skip to Q101.* Who usually decides how your earnings will be used? You, your husband/partner or you and your husband/partner decide together?

Respondent  Husband/partner  Joint decision  Other, specify \_\_\_\_\_

99. *If currently without husband/partner, skip to Q101.* Who usually makes decisions about healthcare for yourself? You, your husband/partner or you and your husband/partner decide together?

Respondent  Husband/partner  Joint decision  Other, specify \_\_\_\_\_

100. *If currently without husband/partner, skip to Q101.* Who usually makes decisions about visits to your family or relatives? You, your husband/partner or you and your husband/partner decide together?

Respondent  Husband/partner  Joint decision  Other, specify \_\_\_\_\_

101. In your opinion, is a husband justified in hitting or beating his wife in the following situations?

▪ If she neglects the children?  Yes  No  Don't know

▪ If she argues with him?  Yes  No  Don't know

▪ If she refuses to have sex with him?  Yes  No  Don't know

**We have come to the end of this questionnaire. I would like to thank you very much for your participation and assure you that all the answers you provided will be treated with confidentiality. No response you provided today will be linked directly to your name.**
